# Supplementary material for: Characteristics of Telemental Health Service Use by American Indian Veterans
Source: Atypon-hosted journal article supplement (doi:10.1176/appi.ps.201100098), 2012-02-01
Supplement: pss6302_0179_ds.pdf [file pss6302_0179_ds.pdf]

Appendix: Mental health and medical comorbidities, active at time of chart review <sup>a</sup>

|                                                    | Active mental health diagnosis |                         |                         |                         |                         |
|----------------------------------------------------|--------------------------------|-------------------------|-------------------------|-------------------------|-------------------------|
|                                                    | PTSD<br>(n=74)                 | Mood<br>(n=32)          | Anxiety<br>(n=8)        | SUD<br>(n=35)           | Other<br>MH<br>(n=9)    |
| <i>Active medical comorbidity</i>                  |                                |                         |                         |                         |                         |
| Pain                                               | 50<br>(68%)                    | 24<br>(75%)             | 7<br>(87%)              | 28<br>(80%)             | 8<br>(89%)              |
| Lung                                               | 6<br>(8%)                      | 2<br>(6%)               | 0<br>(0%)               | 4<br>(11%)              | 0<br>(0%)               |
| Cardio                                             | 46<br>(62%)                    | 25<br>(78%)             | 4<br>(50%)              | 21<br>(60%)             | 6<br>(67%)              |
| Diabetes                                           | 29<br>(39%)                    | 18<br>(56%)             | 1<br>(12%)              | 15<br>(43%)             | 3<br>(33%)              |
| GI                                                 | 32<br>(43%)                    | 18<br>(56%)             | 4<br>(50%)              | 19<br>(54%)             | 5<br>(56%)              |
| Nicotine                                           | 15<br>(20%)                    | 11<br>(34%)             | 1<br>(12%)              | 12<br>(34%)             | 1<br>(11%)              |
| Other medical                                      | 56<br>(76%)                    | 28<br>(87%)             | 5<br>(62%)              | 26<br>(74%)             | 7<br>(78%)              |
| No. medical comorbidities:<br>mean (median), range | 3.16<br>(3.0), 0<br>- 7        | 3.94<br>(4.0), 0<br>- 6 | 2.75<br>(3.0), 0<br>- 4 | 3.57<br>(4.0), 0<br>- 7 | 3.33<br>(4.0), 0<br>- 7 |
| <i>Active mental health comorbidity</i>            |                                |                         |                         |                         |                         |
| PTSD                                               | —                              | 29<br>(91%)             | 6<br>(75%)              | 32<br>(91%)             | 7<br>(78%)              |
| Mood                                               | 29<br>(39%)                    | —                       | 3<br>(37%)              | 17<br>(49%)             | 4<br>(44%)              |
| Anxiety                                            | 6<br>(8%)                      | 3<br>(9%)               | —                       | 5<br>(14%)              | 2<br>(22%)              |
| SUD                                                | 32<br>(43%)                    | 17<br>(53%)             | 5<br>(62%)              | —                       | 7<br>(78%)              |
| Other MH                                           | 7<br>(9%)                      | 4<br>(12%)              | 2<br>(25%)              | 7<br>(20%)              | —                       |

|                         |        |        |        |        |        |
|-------------------------|--------|--------|--------|--------|--------|
| Total no. mental health | 2.0    | 2.66   | 3.0    | 2.74   | 3.22   |
| diagnoses: Mean         | (2.0), | (3.0), | (3.0), | (3.0), | (4.0), |
| (median), range         | 1 - 4  | 1 - 4  | 2 - 3  | 2 - 4  | 2 - 4  |

<sup>a</sup> column percents are reported
